# Supplementary material for: Delafossite CuGaO2 nanomaterial-based room temperature H2S selective gas sensor
Source: Royal Society of Chemistry journal article supplement (doi:10.1039/d4tc02872d), 2024-01-01
Supplement: d4tc02872d1.pdf [file d4tc02872d1.pdf]

## **Delafossite CuGaO<sub>2</sub> nanomaterials-based room temperature H<sub>2</sub>S selective gas sensor**

Amit Kumar<sup>1</sup>, Suraj Barala<sup>2</sup>, Mubashir Mushtaq Ganaie<sup>3</sup>, and Mahesh Kumar<sup>4,2,1\*</sup>

<sup>1</sup>*Department of Electrical Engineering, Indian Institute of Technology Jodhpur, Jodhpur 342030, India.*

<sup>2</sup>*IDRP-Space Science and Technology, Indian, Institute of Technology Jodhpur, Jodhpur 342030, India.*

<sup>3</sup>*Department of Physics, Indian Institute of Technology Jodhpur, Jodhpur 342030, India.*

<sup>4</sup>*Department of Cybernetics, Nanotechnology and Data Processing, Faculty of Automatic Control, Electronics and Computer Science, Silesian University of Technology, Akademicka 16, 44-100 Gliwice, Poland*

## Supplementary Information

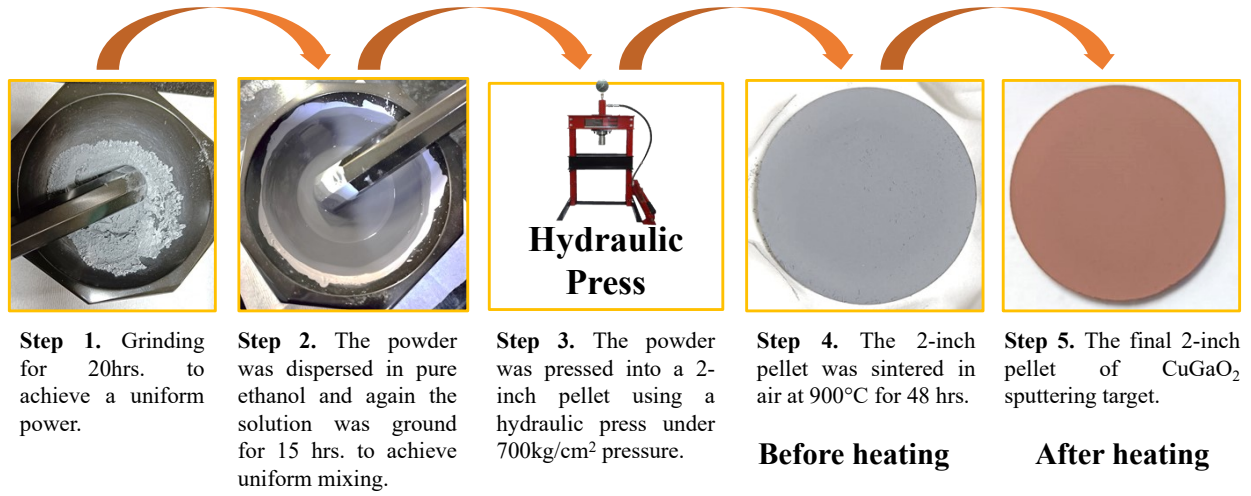

**Fig. S1** Process of synthesis of CuGaO<sub>2</sub> sputtering target.

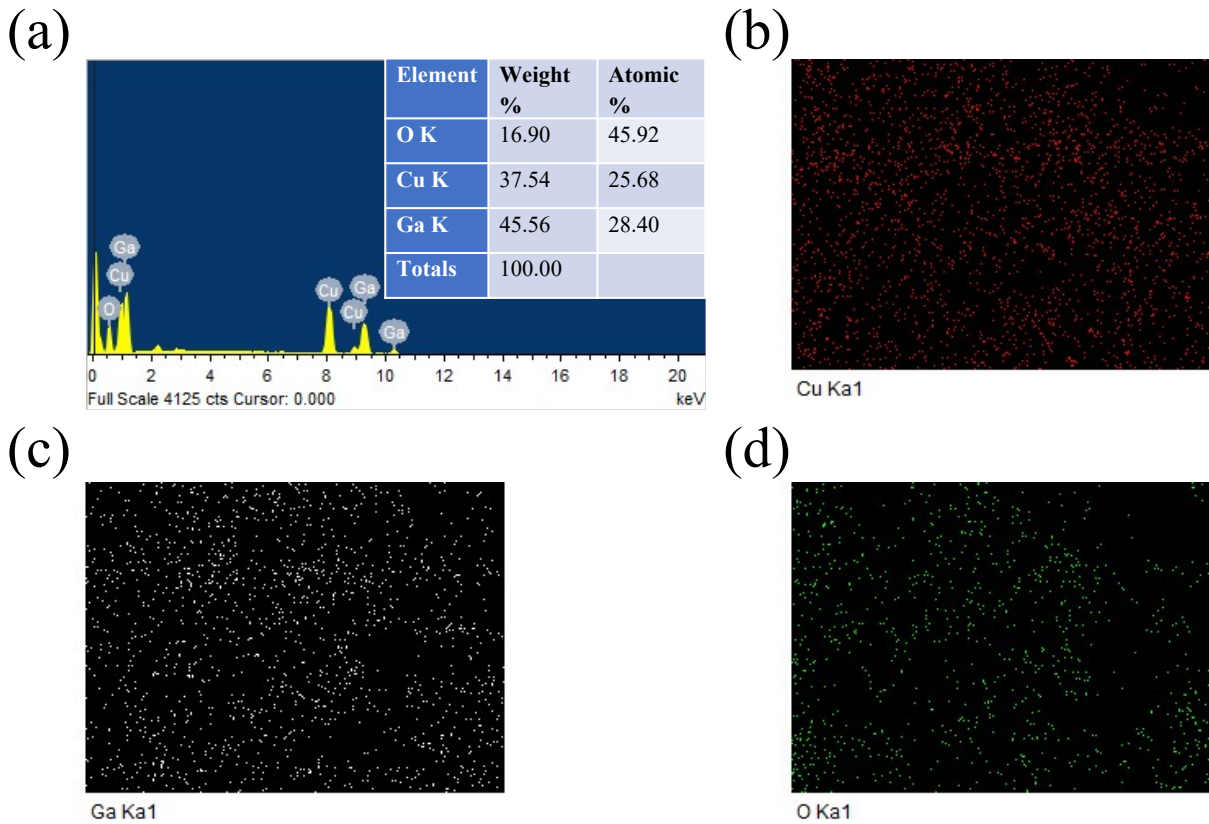

**Fig. S2** (a) EDX spectra of CuGaO<sub>2</sub>. Elemental mapping of CuGaO<sub>2</sub> (b) Cu (c) Ga (d) O.

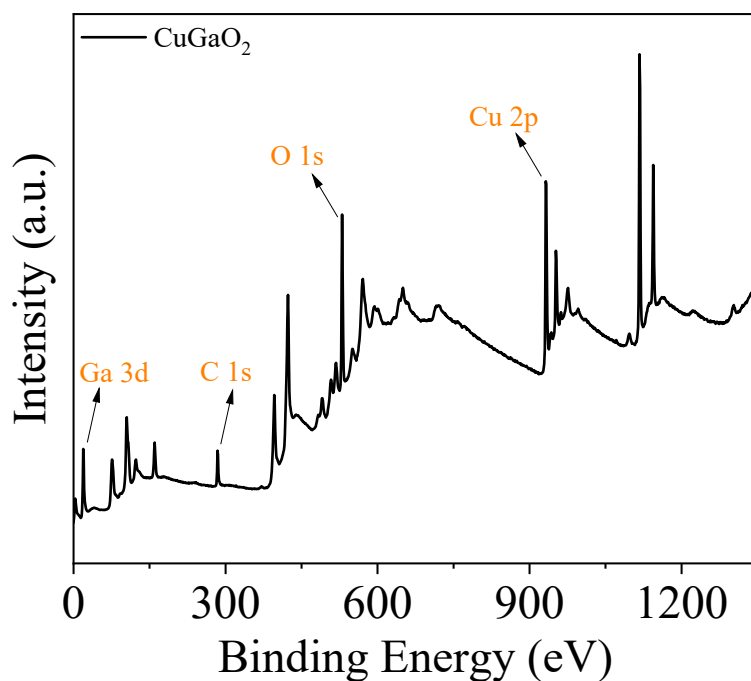

Fig S3 (a) Spectra of CuGaO<sub>2</sub> thin film.

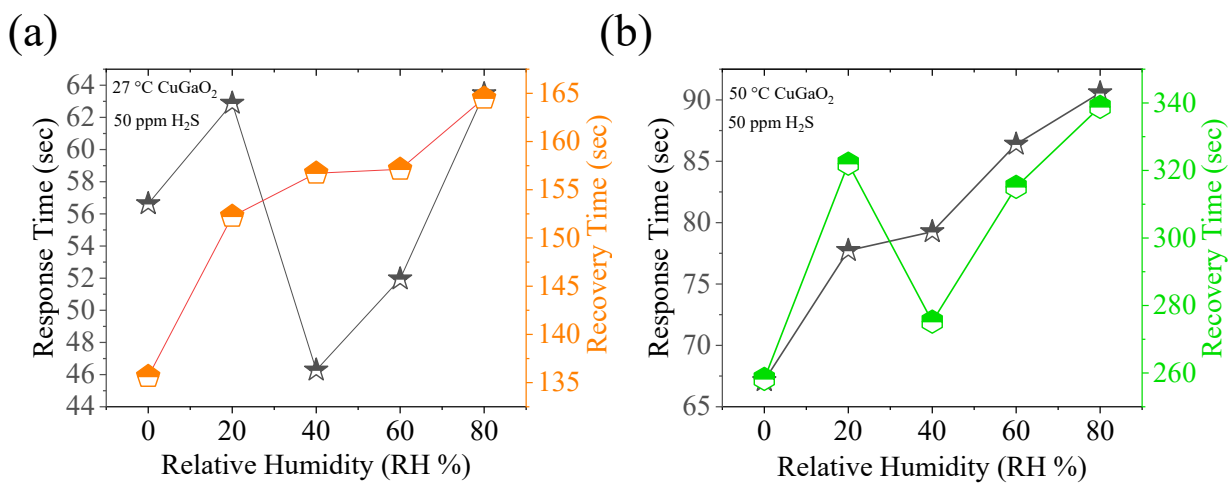

Fig. S4 (a) Response and recovery time for different RH at RT (b) Response and recovery time for different RH at 50 °C.
